# Supplementary figures and images for: Spatiotemporal distribution and speciation of silver nanoparticles in the healing wound
Source: Royal Society of Chemistry journal article supplement (doi:10.1039/d0an00607f), 2020-01-01

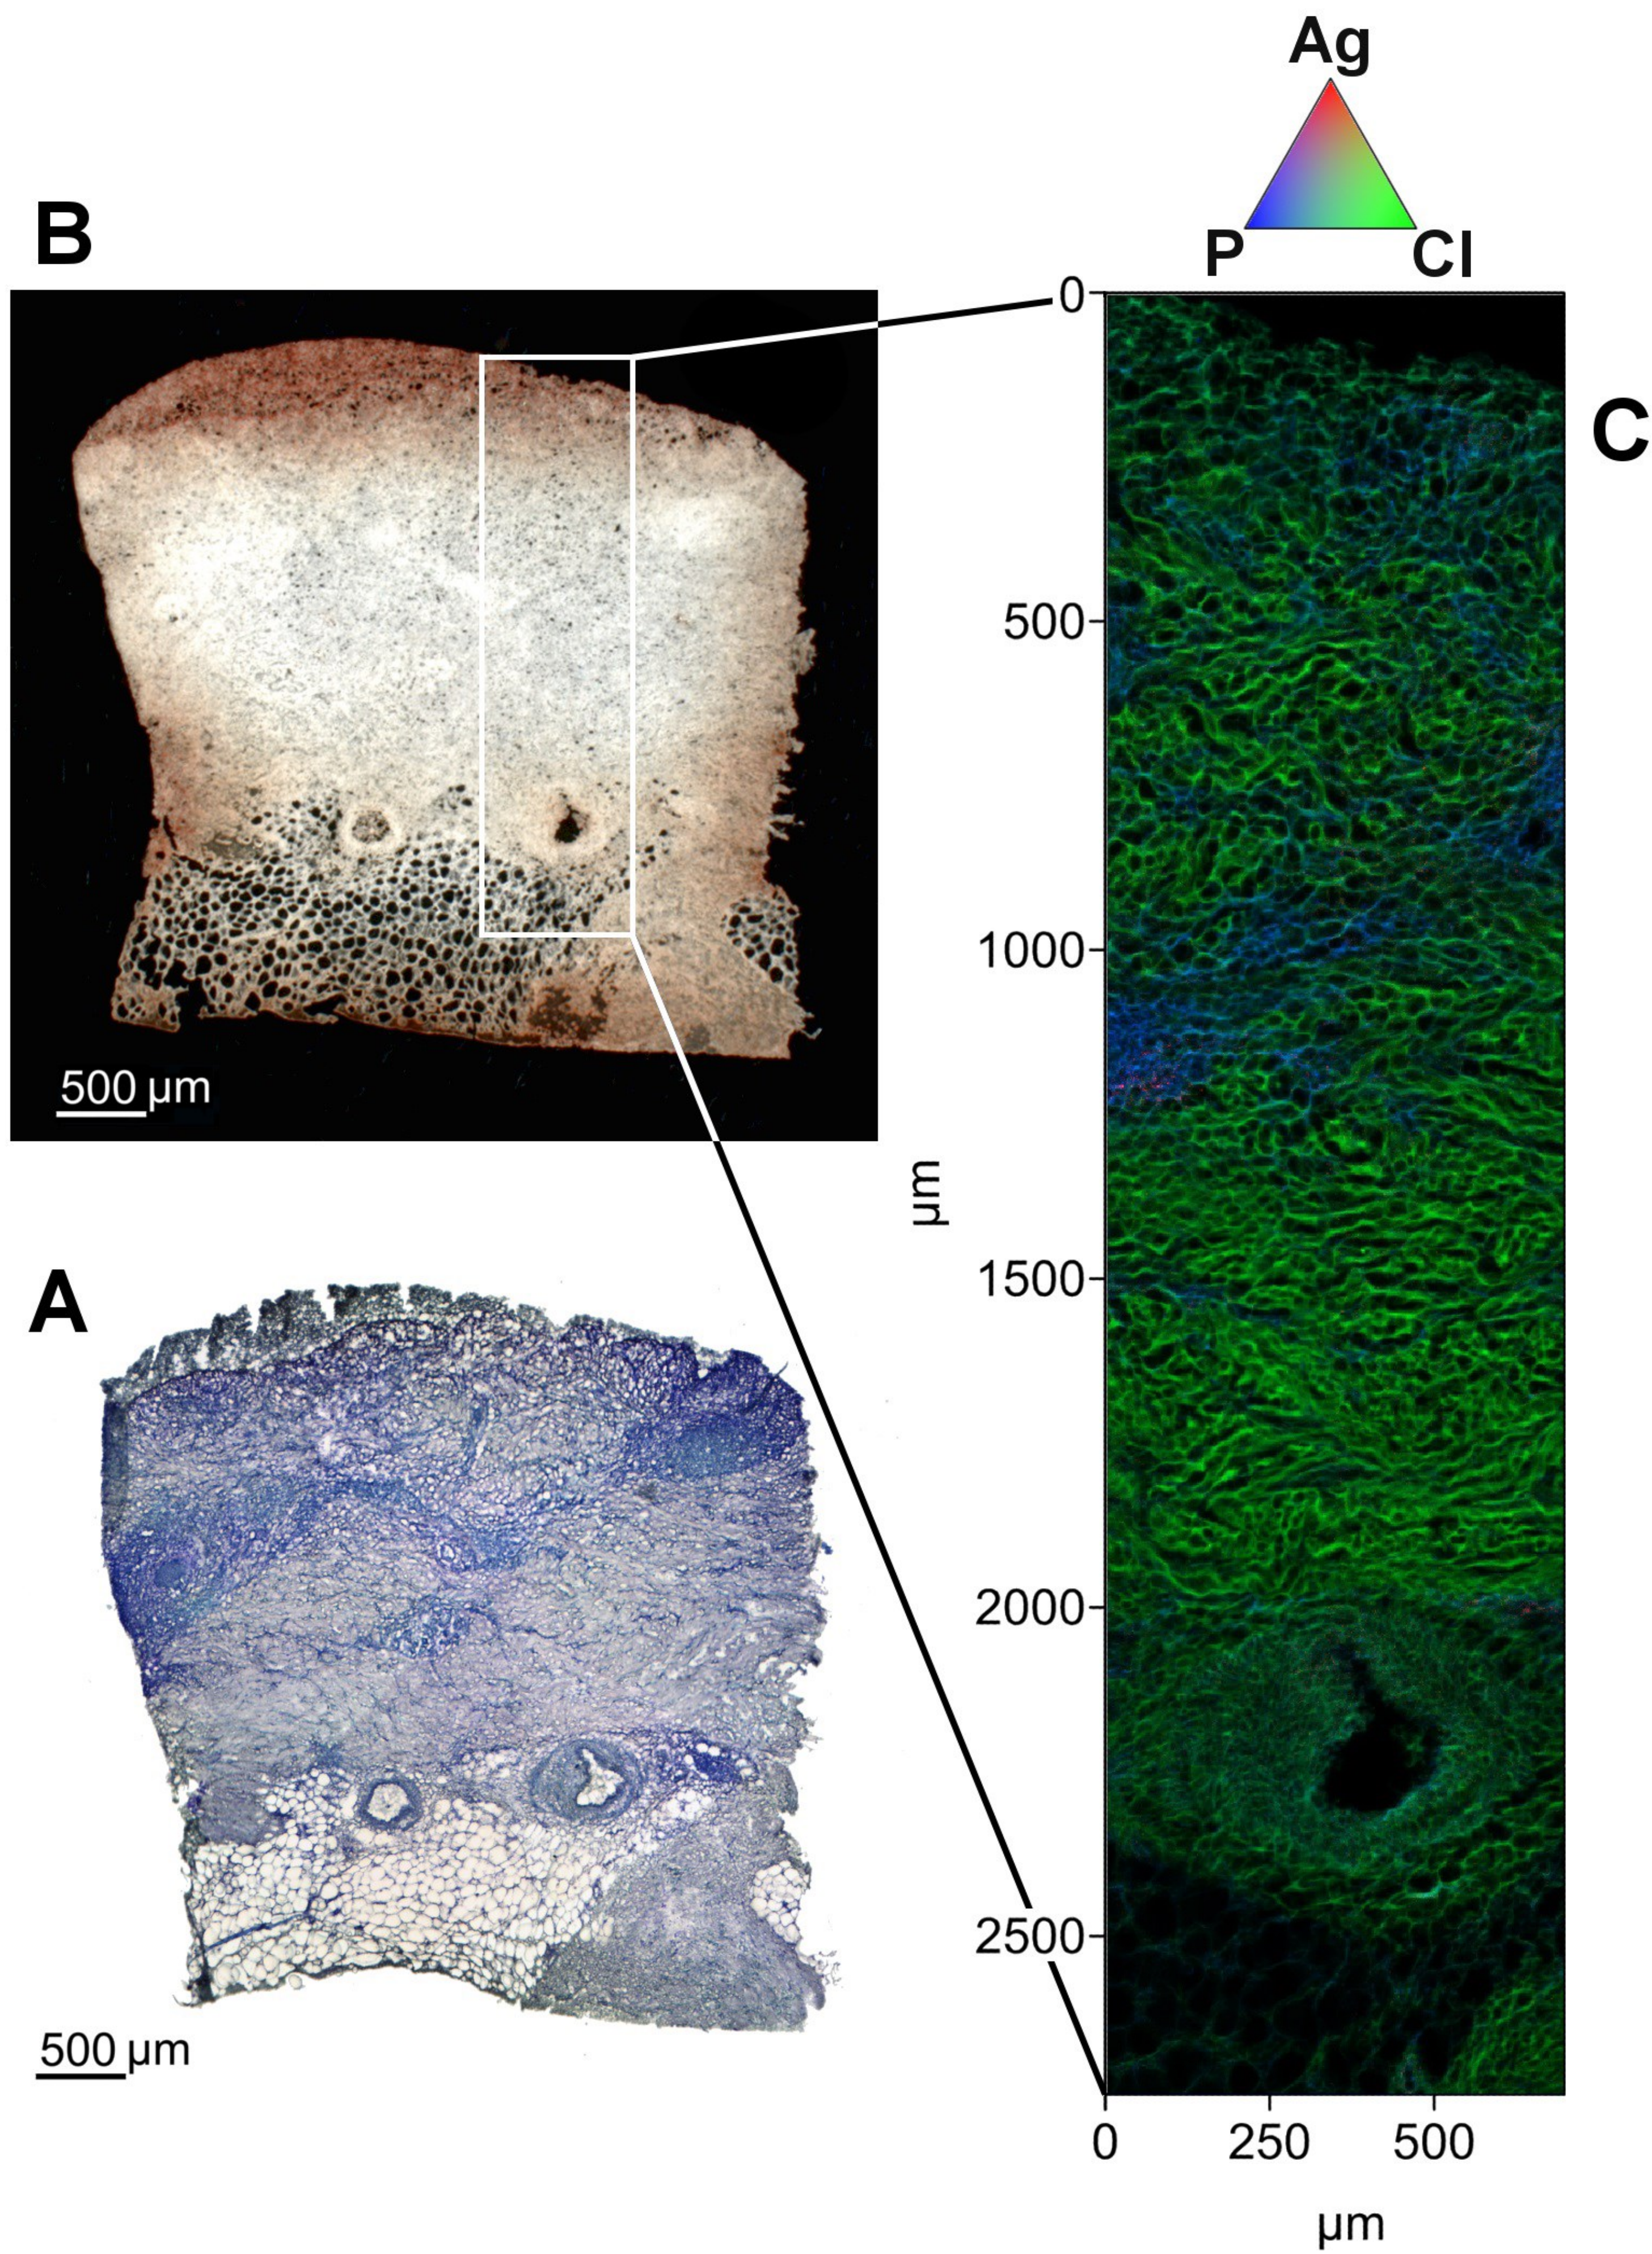

Supplement: d0an00607f7.pdf [file d0an00607f7.pdf]
